# Supplementary material
Source: PubMed Central journal article supplement (PMC3538872)
Supplement: NIHMS426687-supplement-supp__figs_tables_supp__tables.pdf [file NIHMS426687-supplement-supp__figs_tables_supp__tables.pdf]

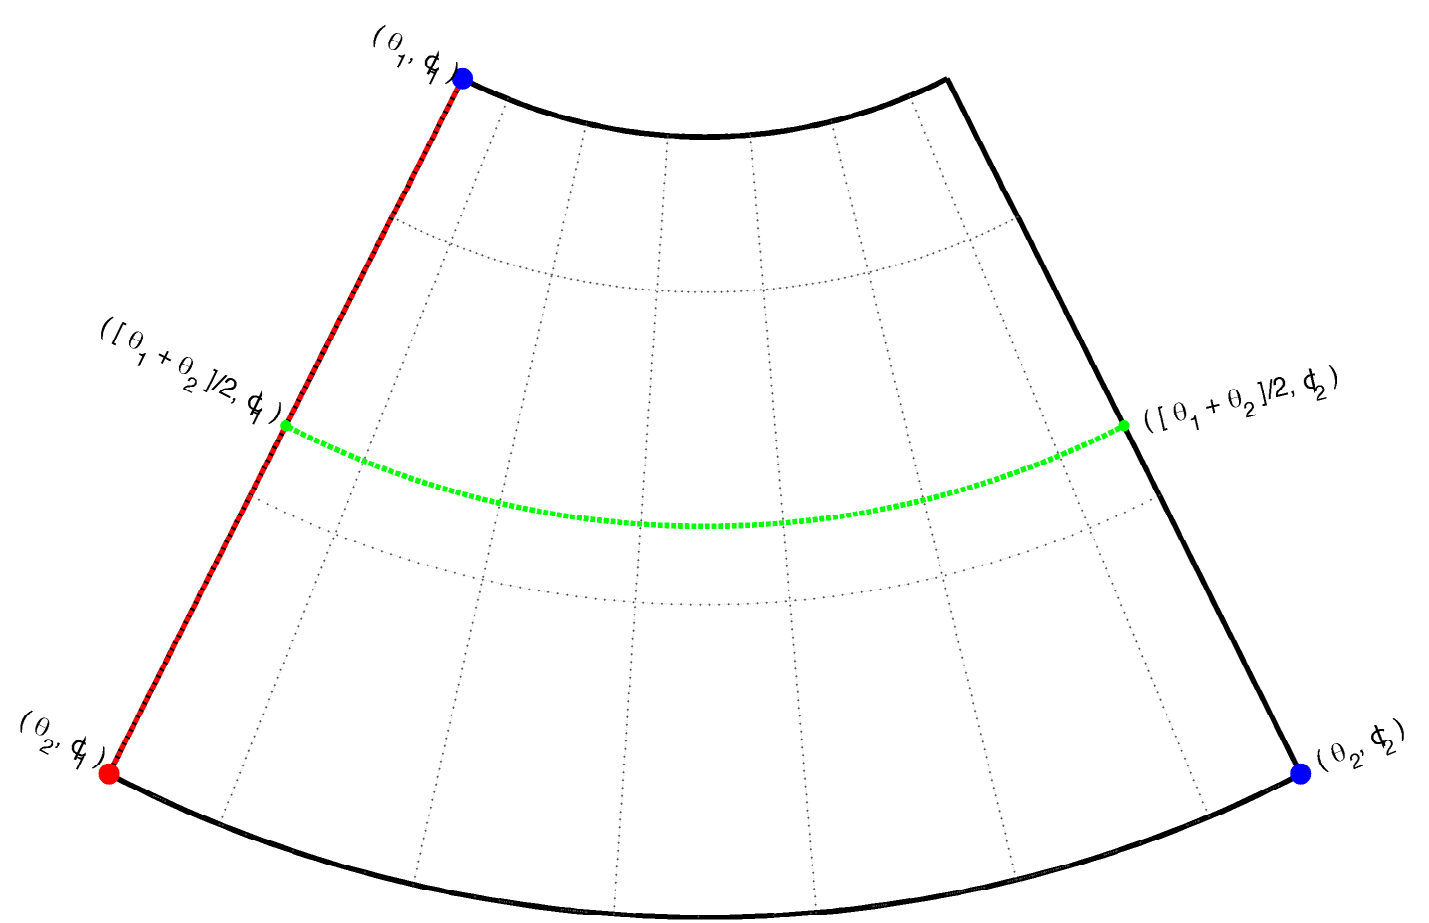

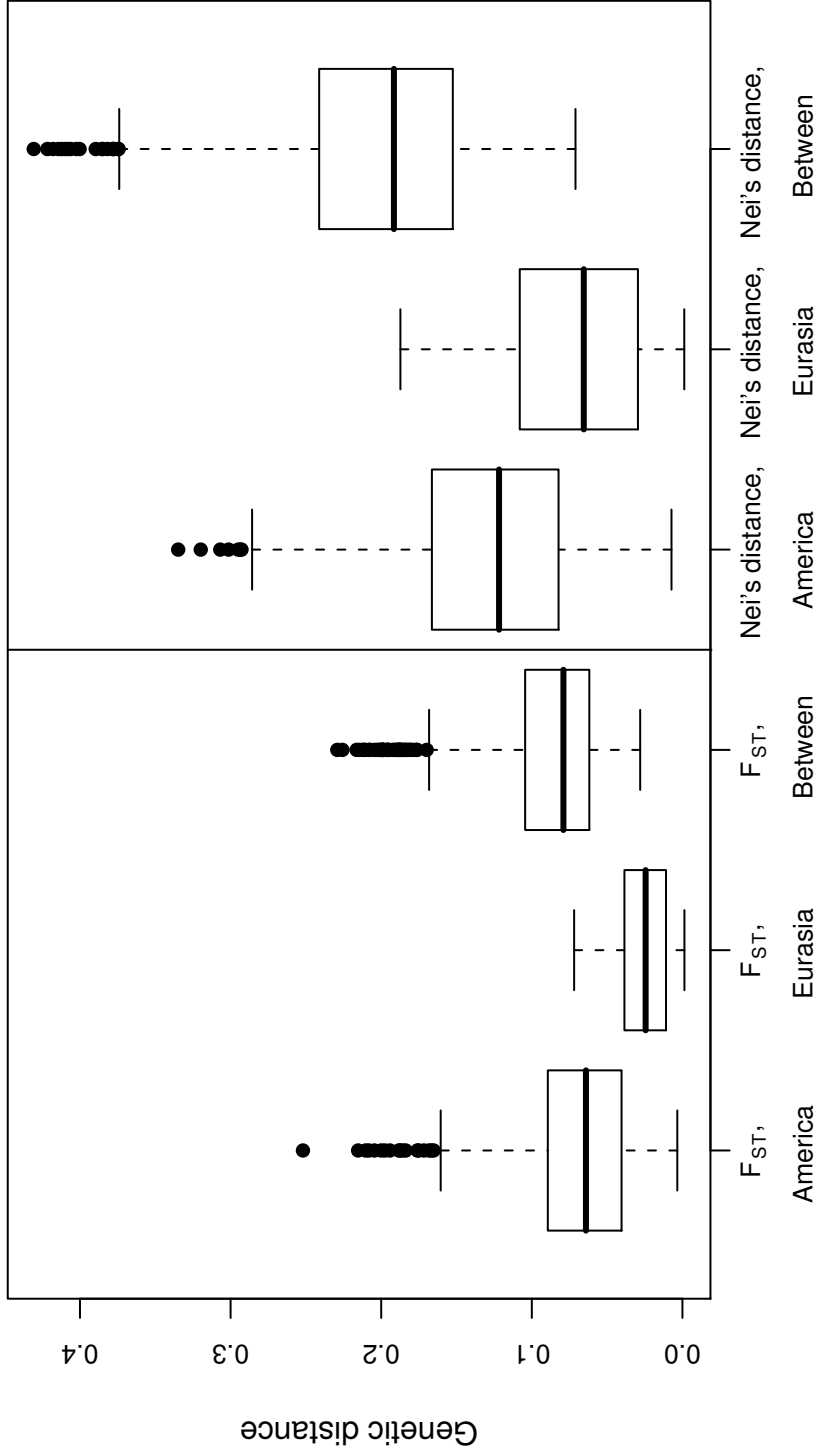

**Table 1. Regression of genetic distance on geographic distance in Eurasia and the Americas.**

The partial Mantel correlation coefficient (Smouse et al., 1986) is given for genetic and geographic distance, controlling for the heterozygosity term. The null hypothesis tested is whether the partial correlation is equal to zero; the test is two-tailed and based on  $10^4$  permutations. The regression coefficient is the coefficient of geographic distance in the multiple regression of genetic distance on the sum of geographic distance and the heterozygosity term. 95% confidence intervals are given for regression coefficients. Here we display the models with lowest-rescaled *AIC* for both latitudinal and longitudinal distance in each continent; the best model overall within each continent has a rescaled *AIC* of 0. Results from all 48 models considered appear in Tables S1-S4.

| Continent | Genetic distance | Geographic distance  | Heterozygosity term | Partial Mantel $r$ ( $p$ -value) | Regression coefficient x $10^{-6}$ ( $p$ -value) | 95% C.I., regression coeff. x $10^{-6}$ | $R^2$  | rescaled <i>AIC</i> |
|-----------|------------------|----------------------|---------------------|----------------------------------|--------------------------------------------------|-----------------------------------------|--------|---------------------|
| Eurasia   | $F_{ST}$         | Latitude, waypoints  | Minimum             | 0.0599 (0.3268)                  | 0.7431 (0.1033)                                  | [-0.1514, 1.6376]                       | 0.2286 | 609.97              |
| Eurasia   | $F_{ST}$         | Longitude, waypoints | Minimum             | 0.7500 (0.0001)                  | 3.7569 ( $<10^{-133}$ )                          | [3.5175, 3.9963]                        | 0.6613 | 0                   |
| America   | $F_{ST}$         | Latitude, waypoints  | Mean                | 0.6337 (0.0001)                  | 4.8605 ( $<10^{-46}$ )                           | [4.2795, 5.4416]                        | 0.9128 | 0                   |
| America   | $F_{ST}$         | Longitude, waypoints | Mean                | 0.3128 (0.0081)                  | 3.8571 ( $<10^{-9}$ )                            | [2.7102, 5.0041]                        | 0.8686 | 166.67              |

**Table 2. Robustness of the observation that 95% confidence intervals for the slope of the latitudinal distance regression term in the Americas are strictly greater than 95% confidence intervals for the slope of the longitudinal distance regression term in Eurasia.**

| Number of populations excluded |         | Lowest- <i>AIC</i> model same as in Table 1: |                       |                                          | Using whichever models had lowest <i>AIC</i> in each continent |                       |                                          |
|--------------------------------|---------|----------------------------------------------|-----------------------|------------------------------------------|----------------------------------------------------------------|-----------------------|------------------------------------------|
| America                        | Eurasia | Number of greater American intervals         | Number of comparisons | Proportion of greater American intervals | Number of greater American intervals                           | Number of comparisons | Proportion of greater American intervals |
| 0                              | 0       | 1                                            | 1                     | 1                                        | 1                                                              | 1                     | 1                                        |
| 0                              | 1       | 37                                           | 37                    | 1                                        | 37                                                             | 39                    | 0.9487                                   |
| 1                              | 0       | 27                                           | 29                    | 0.9310                                   | 27                                                             | 29                    | 0.9310                                   |
| 0                              | 2       | 671                                          | 673                   | 0.9970                                   | 671                                                            | 741                   | 0.9055                                   |
| 1                              | 1       | 992                                          | 1073                  | 0.9245                                   | 993                                                            | 1131                  | 0.8780                                   |
| 2                              | 0       | 339                                          | 406                   | 0.8350                                   | 339                                                            | 406                   | 0.8350                                   |
| 0                              | 3       | 7759                                         | 7881                  | 0.9845                                   | 7759                                                           | 9139                  | 0.8490                                   |
| 1                              | 2       | 17700                                        | 19517                 | 0.9069                                   | 17744                                                          | 21489                 | 0.8257                                   |
| 2                              | 1       | 12264                                        | 15022                 | 0.8164                                   | 12295                                                          | 15834                 | 0.7765                                   |
| 3                              | 0       | 2656                                         | 3653                  | 0.7271                                   | 2656                                                           | 3654                  | 0.7269                                   |
| 1                              | 3       | 202289                                       | 228549                | 0.8851                                   | 203064                                                         | 265031                | 0.7662                                   |
| 2                              | 2       | 218407                                       | 273238                | 0.7993                                   | 219366                                                         | 300846                | 0.7292                                   |
| 3                              | 1       | 97123                                        | 135161                | 0.7186                                   | 97489                                                          | 142506                | 0.6841                                   |
| 2                              | 3       | 2508097                                      | 3199686               | 0.7836                                   | 2527039                                                        | 3710434               | 0.6811                                   |
| 3                              | 2       | 1742920                                      | 2458469               | 0.7089                                   | 1754938                                                        | 2707614               | 0.6481                                   |
| 3                              | 3       | 20123630                                     | 28789293              | 0.6990                                   | 20355336                                                       | 33393906              | 0.6096                                   |

Exclusions of zero, one, two, or three populations from one or both continental samples are considered. There are 29 Native American populations and 39 Eurasian populations in the sample. Rows are grouped by the sum across both continents of the number of populations excluded. When excluding populations, the model with the lowest *AIC* for a continent was sometimes different from the best model overall in the continent, as reported in Table 1. Columns 3-5 reflect comparisons between intervals when the lowest-*AIC* model in the Americas regressed genetic distance on latitudinal distance (with or without the incorporation of waypoints) and the lowest-*AIC* model in Eurasia regressed genetic distance on longitudinal distance (with or without the incorporation of waypoints); note that these models were the lowest-*AIC* models in each continent using the full dataset (see Table 1). Columns 6-8 reflect comparisons between confidence intervals for the coefficient of the geographic distance term in lowest-*AIC* models — regardless of which models these were — after the exclusion of populations. Entries in column 5 are the ratios of entries in column 3 to entries in column 4; entries in column 8 are the ratios of entries in column 6 to entries in column 7.

**Table S1. Regression of genetic distance on geographic distance in Eurasia; results from 24 models using  $F_{ST}$  (Weir, 1996).**

The table format is the same as in Table 1. Models with a rescaled  $AIC \leq 2$  are considered equivalent. The minimum  $AIC$  value observed for these models when fitted to Eurasian data was -4809.58; this value was subtracted from all  $AIC$  values to give the rescaled  $AIC$  values displayed here.

| Continent | Genetic distance | Geographic distance     | Heterozygosity term | Partial Mantel $r$ ( $p$ -value) | Regression coefficient $\times 10^{-6}$ ( $p$ -value) | 95% C.I., regression coeff. $\times 10^{-6}$ | $R^2$  | Rescaled $AIC$ |
|-----------|------------------|-------------------------|---------------------|----------------------------------|-------------------------------------------------------|----------------------------------------------|--------|----------------|
| Eurasia   | $F_{ST}$         | Great circle            | None                | 0.7276<br>(0.0001)               | 4.8069<br>( $< 10^{-122}$ )                           | [4.4796,<br>5.1341]                          | 0.5294 | 241.79         |
| Eurasia   | $F_{ST}$         | Great circle, waypoints | None                | 0.7274<br>(0.0001)               | 4.8067<br>( $< 10^{-122}$ )                           | [4.4793,<br>5.1342]                          | 0.5292 | 242.18         |
| Eurasia   | $F_{ST}$         | Latitude                | None                | 0.0961<br>(0.1153)               | 1.3489<br>(0.0088)                                    | [0.3401,<br>2.3578]                          | 0.0092 | 793.44         |
| Eurasia   | $F_{ST}$         | Latitude, waypoints     | None                | 0.0961<br>(0.1160)               | 1.3489<br>(0.0088)                                    | [0.3401,<br>2.3578]                          | 0.0092 | 793.44         |
| Eurasia   | $F_{ST}$         | Longitude               | None                | 0.7257<br>(0.0001)               | 4.0816<br>( $< 10^{-121}$ )                           | [3.8022,<br>4.3611]                          | 0.5266 | 246.15         |
| Eurasia   | $F_{ST}$         | Longitude, waypoints    | None                | 0.7258<br>(0.0001)               | 4.0819<br>( $< 10^{-121}$ )                           | [3.8025,<br>4.3612]                          | 0.5269 | 245.79         |
| Eurasia   | $F_{ST}$         | Great circle            | Maximum             | 0.7260<br>(0.0001)               | 4.9140<br>( $< 10^{-121}$ )                           | [4.5776,<br>5.2504]                          | 0.5335 | 237.32         |

|         |          |                         |         |                    |                             |                   |        |        |
|---------|----------|-------------------------|---------|--------------------|-----------------------------|-------------------|--------|--------|
| Eurasia | $F_{ST}$ | Great circle, waypoints | Maximum | 0.7258<br>(0.0001) | 4.9143<br>( $< 10^{-121}$ ) | [4.5778, 5.2509]  | 0.5333 | 237.67 |
| Eurasia | $F_{ST}$ | Latitude                | Maximum | 0.1096<br>(0.0751) | 1.5358<br>(0.0028)          | [0.5291, 2.5424]  | 0.0255 | 783.19 |
| Eurasia | $F_{ST}$ | Latitude, waypoints     | Maximum | 0.1096<br>(0.0775) | 1.5358<br>(0.0028)          | [0.5291, 2.5424]  | 0.0255 | 783.19 |
| Eurasia | $F_{ST}$ | Longitude               | Maximum | 0.7269<br>(0.0001) | 4.2303<br>( $< 10^{-121}$ ) | [3.9414, 4.5191]  | 0.5348 | 235.24 |
| Eurasia | $F_{ST}$ | Longitude, waypoints    | Maximum | 0.7270<br>(0.0001) | 4.2301<br>( $< 10^{-121}$ ) | [3.9414, 4.5188]  | 0.5350 | 234.91 |
| Eurasia | $F_{ST}$ | Great circle            | Minimum | 0.7456<br>(0.0001) | 4.3986<br>( $< 10^{-131}$ ) | [4.1145, 4.6827]  | 0.6562 | 11.18  |
| Eurasia | $F_{ST}$ | Great circle, waypoints | Minimum | 0.7456<br>(0.0001) | 4.3991<br>( $< 10^{-131}$ ) | [4.1149, 4.6833]  | 0.6562 | 11.22  |
| Eurasia | $F_{ST}$ | Latitude                | Minimum | 0.0599<br>(0.3359) | 0.7431<br>(0.1033)          | [-0.1514, 1.6376] | 0.2286 | 609.97 |
| Eurasia | $F_{ST}$ | Latitude, waypoints     | Minimum | 0.0599<br>(0.3268) | 0.7431<br>(0.1033)          | [-0.1514, 1.6376] | 0.2286 | 609.97 |
| Eurasia | $F_{ST}$ | Longitude               | Minimum | 0.7500<br>(0.0001) | 3.7572<br>( $< 10^{-133}$ ) | [3.5177, 3.9966]  | 0.6613 | 0.04   |
| Eurasia | $F_{ST}$ | Longitude, waypoints    | Minimum | 0.7500<br>(0.0001) | 3.7569<br>( $< 10^{-133}$ ) | [3.5175, 3.9963]  | 0.6613 | 0      |
| Eurasia | $F_{ST}$ | Great circle            | Mean    | 0.7545             | 4.8548                      | [4.5496,          | 0.5918 | 138.38 |

|         |          |                         |      |                                |                                                              |                                |        |        |
|---------|----------|-------------------------|------|--------------------------------|--------------------------------------------------------------|--------------------------------|--------|--------|
| Eurasia | $F_{ST}$ | Great circle, waypoints | Mean | (0.0001)<br>0.7545<br>(0.0001) | (< 10 <sup>-136</sup> )<br>4.8555<br>(< 10 <sup>-136</sup> ) | 5.1600]<br>[4.5502,<br>5.1607] | 0.5917 | 138.55 |
| Eurasia | $F_{ST}$ | Latitude                | Mean | 0.0726<br>(0.2323)             | 0.9986<br>(0.0483)                                           | [0.0075,<br>1.9897]            | 0.0572 | 758.64 |
| Eurasia | $F_{ST}$ | Latitude, waypoints     | Mean | 0.0726<br>(0.2371)             | 0.9986<br>(0.0483)                                           | [0.0075,<br>1.9897]            | 0.0572 | 758.64 |
| Eurasia | $F_{ST}$ | Longitude               | Mean | 0.7602<br>(0.0001)             | 4.1697<br>(< 10 <sup>-139</sup> )                            | [3.9122,<br>4.4272]            | 0.6000 | 123.32 |
| Eurasia | $F_{ST}$ | Longitude, waypoints    | Mean | 0.7603<br>(0.0001)             | 4.1693<br>(< 10 <sup>-139</sup> )                            | [3.9119,<br>4.4267]            | 0.6001 | 123.17 |



**Table S2: Regression of genetic distance on geographic distance in Eurasia; results from 24 models using Nei's standard genetic distance (Nei, 1978).**

The table format is the same as in Table 1. Models with a rescaled  $AIC \leq 2$  are considered equivalent. The minimum  $AIC$  value observed for these models when fitted to Eurasian data was -4809.58 (in Table S1); this value was subtracted from all  $AIC$  values to give the rescaled  $AIC$  values displayed here.

| Continent | Genetic distance | Geographic distance     | Heterozygosity term | Partial Mantel $r$ ( $p$ -value) | Regression coefficient x $10^{-6}$ ( $p$ -value) | 95% C.I., regression coeff. x $10^{-6}$ | $R^2$  | Rescaled $AIC$ |
|-----------|------------------|-------------------------|---------------------|----------------------------------|--------------------------------------------------|-----------------------------------------|--------|----------------|
| Eurasia   | Nei's            | Great circle            | None                | 0.7412<br>(0.0001)               | 13.5021<br>( $< 10^{-129}$ )                     | [12.6189,<br>14.3853]                   | 0.5493 | 1712.99        |
| Eurasia   | Nei's            | Great circle, waypoints | None                | 0.7410<br>(0.0001)               | 13.5019<br>( $< 10^{-129}$ )                     | [12.6183,<br>14.3855]                   | 0.5491 | 1713.39        |
| Eurasia   | Nei's            | Latitude                | None                | 0.0839<br>(0.1491)               | 3.2464<br>(0.0224)                               | [0.4615,<br>6.0313]                     | 0.0070 | 2298.33        |
| Eurasia   | Nei's            | Latitude, waypoints     | None                | 0.0839<br>(0.1517)               | 3.2464<br>(0.0224)                               | [0.4615,<br>6.0313]                     | 0.0070 | 2298.33        |
| Eurasia   | Nei's            | Longitude               | None                | 0.7422<br>(0.0001)               | 11.5112<br>( $< 10^{-129}$ )                     | [10.7605,<br>12.2618]                   | 0.5509 | 1710.46        |
| Eurasia   | Nei's            | Longitude, waypoints    | None                | 0.7423<br>(0.0001)               | 11.5117<br>( $< 10^{-129}$ )                     | [10.7614,<br>12.262]                    | 0.5511 | 1710.09        |
| Eurasia   | Nei's            | Great circle            | Maximum             | 0.7324<br>(0.0001)               | 13.5693<br>( $< 10^{-124}$ )                     | [12.6578,<br>14.4808]                   | 0.5495 | 1714.64        |

|         |       |                         |         |                    |                              |                       |        |         |
|---------|-------|-------------------------|---------|--------------------|------------------------------|-----------------------|--------|---------|
| Eurasia | Nei's | Great circle, waypoints | Maximum | 0.7323<br>(0.0001) | 13.5701<br>( $< 10^{-124}$ ) | [12.6581,<br>14.4822] | 0.5493 | 1715.03 |
| Eurasia | Nei's | Latitude                | Maximum | 0.1034<br>(0.0777) | 3.9646<br>(0.0049)           | [1.2076,<br>6.7217]   | 0.0386 | 2276.39 |
| Eurasia | Nei's | Latitude, waypoints     | Maximum | 0.1034<br>(0.0741) | 3.9646<br>(0.0049)           | [1.2076,<br>6.7217]   | 0.0386 | 2276.39 |
| Eurasia | Nei's | Longitude               | Maximum | 0.7346<br>(0.0001) | 11.7011<br>( $< 10^{-125}$ ) | [10.9200,<br>12.4821] | 0.5526 | 1709.56 |
| Eurasia | Nei's | Longitude, waypoints    | Maximum | 0.7347<br>(0.0001) | 11.7007<br>( $< 10^{-125}$ ) | [10.9200,<br>12.4813] | 0.5528 | 1709.21 |
| Eurasia | Nei's | Great circle            | Minimum | 0.7525<br>(0.0001) | 12.4989<br>( $< 10^{-135}$ ) | [11.7084,<br>13.2894] | 0.6500 | 1527.63 |
| Eurasia | Nei's | Great circle, waypoints | Minimum | 0.7525<br>(0.0001) | 12.5001<br>( $< 10^{-135}$ ) | [11.7095,<br>13.2907] | 0.6500 | 1527.70 |
| Eurasia | Nei's | Latitude                | Minimum | 0.0487<br>(0.4114) | 1.7002<br>(0.1857)           | [-0.8197,<br>4.2201]  | 0.1950 | 2144.87 |
| Eurasia | Nei's | Latitude, waypoints     | Minimum | 0.0487<br>(0.3991) | 1.7002<br>(0.1857)           | [-0.8197,<br>4.2201]  | 0.1950 | 2144.87 |
| Eurasia | Nei's | Longitude               | Minimum | 0.7595<br>(0.0001) | 10.7113<br>( $< 10^{-139}$ ) | [10.0483,<br>11.3743] | 0.6585 | 1509.41 |
| Eurasia | Nei's | Longitude, waypoints    | Minimum | 0.7595<br>(0.0001) | 10.7107<br>( $< 10^{-139}$ ) | [10.0477,<br>11.3736] | 0.6585 | 1509.34 |

|         |       |                            |      |                    |                              |                       |        |         |
|---------|-------|----------------------------|------|--------------------|------------------------------|-----------------------|--------|---------|
| Eurasia | Nei's | Great circle               | Mean | 0.7588<br>(0.0001) | 13.608<br>( $< 10^{-138}$ )  | [12.7640,<br>14.4519] | 0.5894 | 1646.03 |
| Eurasia | Nei's | Great circle,<br>waypoints | Mean | 0.7588<br>(0.0001) | 13.6096<br>( $< 10^{-138}$ ) | [12.7653,<br>14.4539] | 0.5893 | 1646.23 |
| Eurasia | Nei's | Latitude                   | Mean | 0.0651<br>(0.2690) | 2.4962<br>(0.0766)           | [-0.2675,<br>5.2599]  | 0.0360 | 2278.41 |
| Eurasia | Nei's | Latitude,<br>waypoints     | Mean | 0.0651<br>(0.2627) | 2.4962<br>(0.0766)           | [-0.2675,<br>5.2599]  | 0.0360 | 2278.41 |
| Eurasia | Nei's | Longitude                  | Mean | 0.7661<br>(0.0001) | 11.7100<br>( $< 10^{-143}$ ) | [11.0000,<br>12.4200] | 0.6000 | 1626.56 |
| Eurasia | Nei's | Longitude,<br>waypoints    | Mean | 0.7661<br>(0.0001) | 11.7090<br>( $< 10^{-143}$ ) | [10.9992,<br>12.4188] | 0.6001 | 1626.36 |

**Table S3: Regression of genetic distance on geographic distance in the Americas; results from 24 models using  $F_{ST}$  (Weir, 1996).**

The table format is the same as in Table 1. Models with a rescaled  $AIC \leq 2$  are considered equivalent. The minimum  $AIC$  value observed for these models when fitted to Native American data was -2386.85; this value was subtracted from all  $AIC$  values to give the rescaled  $AIC$  values displayed here.

| Continent | Genetic distance | Geographic distance        | Heterozygosity term | Partial Mantel $r$ ( $p$ -value) | Regression coefficient $\times 10^{-6}$ ( $p$ -value) | 95% C.I., regression coeff. $\times 10^{-6}$ | $R^2$  | Rescaled $AIC$ |
|-----------|------------------|----------------------------|---------------------|----------------------------------|-------------------------------------------------------|----------------------------------------------|--------|----------------|
| America   | $F_{ST}$         | Great circle               | None                | 0.0476<br>(0.7362)               | 0.8880<br>(0.3382)                                    | [-0.9327,<br>2.7088]                         | 0.0023 | 987.60         |
| America   | $F_{ST}$         | Great circle,<br>waypoints | None                | 0.0394<br>(0.7763)               | 0.7116<br>(0.4290)                                    | [-1.0555,<br>2.4788]                         | 0.0015 | 987.90         |
| America   | $F_{ST}$         | Latitude                   | None                | 0.0258<br>(0.8640)               | 0.5019<br>(0.6047)                                    | [-1.4028,<br>2.4066]                         | 0.0007 | 988.26         |
| America   | $F_{ST}$         | Latitude,<br>waypoints     | None                | 0.0239<br>(0.8737)               | 0.4672<br>(0.6313)                                    | [-1.4453,<br>2.3798]                         | 0.0006 | 988.29         |
| America   | $F_{ST}$         | Longitude                  | None                | 0.1568<br>(0.2032)               | 4.9519<br>(0.0015)                                    | [1.9006,<br>8.0033]                          | 0.0246 | 978.42         |
| America   | $F_{ST}$         | Longitude,<br>waypoints    | None                | 0.1590<br>(0.1956)               | 5.1334<br>(0.0013)                                    | [2.0168,<br>8.2499]                          | 0.0253 | 978.12         |
| America   | $F_{ST}$         | Great circle               | Maximum             | 0.3617                           | 5.8135                                                | [4.3461,                                     | 0.4422 | 753.56         |

|         |          |                         |         |                                |                                                |                                |        |        |
|---------|----------|-------------------------|---------|--------------------------------|------------------------------------------------|--------------------------------|--------|--------|
| America | $F_{ST}$ | Great circle, waypoints | Maximum | (0.0033)<br>0.3571<br>(0.0038) | ( $< 10^{-13}$ )<br>5.5858<br>( $< 10^{-12}$ ) | 7.2809]<br>[4.1552,<br>7.0165] | 0.4401 | 755.08 |
| America | $F_{ST}$ | Latitude                | Maximum | 0.3700<br>(0.0055)             | 6.3273<br>( $< 10^{-13}$ )                     | [4.7714,<br>7.8832]            | 0.4460 | 750.72 |
| America | $F_{ST}$ | Latitude, waypoints     | Maximum | 0.3733<br>(0.0032)             | 6.4281<br>( $< 10^{-14}$ )                     | [4.8636,<br>7.9926]            | 0.4476 | 749.57 |
| America | $F_{ST}$ | Longitude               | Maximum | 0.2651<br>(0.0294)             | 6.7374<br>( $< 10^{-7}$ )                      | [4.3378,<br>9.1370]            | 0.4033 | 780.89 |
| America | $F_{ST}$ | Longitude, waypoints    | Maximum | 0.2676<br>(0.0278)             | 6.9480<br>( $< 10^{-7}$ )                      | [4.4981,<br>9.3979]            | 0.4041 | 780.32 |
| America | $F_{ST}$ | Great circle            | Minimum | 0.2231<br>(0.0997)             | 1.7131<br>( $< 10^{-5}$ )                      | [0.9802,<br>2.4460]            | 0.8391 | 248.72 |
| America | $F_{ST}$ | Great circle, waypoints | Minimum | 0.2200<br>(0.0962)             | 1.6394<br>( $< 10^{-5}$ )                      | [0.9276,<br>2.3513]            | 0.8389 | 249.31 |
| America | $F_{ST}$ | Latitude                | Minimum | 0.2321<br>(0.0985)             | 1.8660<br>( $< 10^{-5}$ )                      | [1.1002,<br>2.6317]            | 0.8398 | 246.96 |
| America | $F_{ST}$ | Latitude, waypoints     | Minimum | 0.2362<br>(0.0983)             | 1.9075<br>( $< 10^{-5}$ )                      | [1.1392,<br>2.6758]            | 0.8401 | 246.13 |
| America | $F_{ST}$ | Longitude               | Minimum | 0.1496<br>(0.2359)             | 1.9558<br>(0.0025)                             | [0.6903,<br>3.2212]            | 0.8345 | 260.26 |
| America | $F_{ST}$ | Longitude,              | Minimum | 0.1496                         | 1.9985                                         | [0.7052,                       | 0.8345 | 260.26 |

|         |          |                            |      |                    |                            |                     |        |        |
|---------|----------|----------------------------|------|--------------------|----------------------------|---------------------|--------|--------|
| America | $F_{ST}$ | waypoints                  | Mean | (0.2366)           | (0.0025)                   | 3.2919]             |        |        |
| America | $F_{ST}$ | Great circle               | Mean | 0.5881<br>(0.0001) | 4.2588<br>( $< 10^{-38}$ ) | [3.6852,<br>4.8323] | 0.9047 | 36.16  |
| America | $F_{ST}$ | Great circle,<br>waypoints | Mean | 0.5879<br>(0.0001) | 4.1379<br>( $< 10^{-38}$ ) | [3.5804,<br>4.6954] | 0.9047 | 36.27  |
| America | $F_{ST}$ | Latitude                   | Mean | 0.6249<br>(0.0001) | 4.7671<br>( $< 10^{-44}$ ) | [4.1838,<br>5.3503] | 0.9112 | 7.50   |
| America | $F_{ST}$ | Latitude,<br>waypoints     | Mean | 0.6337<br>(0.0001) | 4.8605<br>( $< 10^{-46}$ ) | [4.2795,<br>5.4416] | 0.9128 | 0      |
| America | $F_{ST}$ | Longitude                  | Mean | 0.3119<br>(0.0087) | 3.7633<br>( $< 10^{-9}$ )  | [2.6405,<br>4.8861] | 0.8685 | 166.94 |
| America | $F_{ST}$ | Longitude,<br>waypoints    | Mean | 0.3128<br>(0.0081) | 3.8571<br>( $< 10^{-9}$ )  | [2.7102,<br>5.0041] | 0.8686 | 166.67 |

**Table S4: Regression of genetic distance on geographic distance in the Americas; results from 24 models using Nei's standard genetic distance (Nei, 1978).**

The table format is the same as in Table 1. Models with a rescaled  $AIC \leq 2$  are considered equivalent. The minimum  $AIC$  value observed for these models when fitted to Native American data was -2386.85 (in Table S3); this value was subtracted from all  $AIC$  values to give the rescaled  $AIC$  values displayed here.

| Continent | Genetic distance | Geographic distance        | Heterozygosity term | Partial Mantel $r$ ( $p$ -value) | Regression coefficient x $10^{-6}$ ( $p$ -value) | 95% C.I., regression coeff. x $10^{-6}$ | $R^2$  | Rescaled $AIC$ |
|-----------|------------------|----------------------------|---------------------|----------------------------------|--------------------------------------------------|-----------------------------------------|--------|----------------|
| America   | Nei's            | Great circle               | None                | 0.1231<br>(0.3584)               | 3.3111<br>(0.0130)                               | [0.7009,<br>5.9212]                     | 0.0152 | 1280.05        |
| America   | Nei's            | Great circle,<br>waypoints | None                | 0.1152<br>(0.3885)               | 3.0065<br>(0.0202)                               | [0.4717,<br>5.5414]                     | 0.0133 | 1280.83        |
| America   | Nei's            | Latitude                   | None                | 0.0982<br>(0.5023)               | 2.7615<br>(0.0479)                               | [0.0256,<br>5.4974]                     | 0.0097 | 1282.32        |
| America   | Nei's            | Latitude,<br>waypoints     | None                | 0.0983<br>(0.4927)               | 2.7757<br>(0.0477)                               | [0.0286,<br>5.5227]                     | 0.0097 | 1282.31        |
| America   | Nei's            | Longitude                  | None                | 0.2103<br>(0.0824)               | 9.5873<br>( $< 10^{-4}$ )                        | [5.2292,<br>13.9455]                    | 0.0442 | 1267.88        |
| America   | Nei's            | Longitude,<br>waypoints    | None                | 0.2133<br>(0.0721)               | 9.9357<br>( $< 10^{-4}$ )                        | [5.4857,<br>14.3857]                    | 0.0455 | 1267.34        |
| America   | Nei's            | Great circle               | Maximum             | 0.4168                           | 10.1186                                          | [7.9574,                                | 0.4188 | 1067.96        |

|         |       |                            |         |                                |                                                |                                  |        |         |
|---------|-------|----------------------------|---------|--------------------------------|------------------------------------------------|----------------------------------|--------|---------|
| America | Nei's | Great circle,<br>waypoints | Maximum | (0.0004)<br>0.4127<br>(0.0002) | ( $< 10^{-17}$ )<br>9.7496<br>( $< 10^{-17}$ ) | 12.2798]<br>[7.6422,<br>11.8571] | 0.4164 | 1069.63 |
| America | Nei's | Latitude                   | Maximum | 0.4193<br>(0.0008)             | 10.8323<br>( $< 10^{-17}$ )                    | [8.5356,<br>13.1289]             | 0.4203 | 1066.92 |
| America | Nei's | Latitude,<br>waypoints     | Maximum | 0.4248<br>(0.0007)             | 11.0513<br>( $< 10^{-18}$ )                    | [8.7451,<br>13.3575]             | 0.4235 | 1064.62 |
| America | Nei's | Longitude                  | Maximum | 0.3115<br>(0.0090)             | 11.9576<br>( $< 10^{-9}$ )                     | [8.3854,<br>15.5299]             | 0.3648 | 1103.99 |
| America | Nei's | Longitude,<br>waypoints    | Maximum | 0.3147<br>(0.0077)             | 12.3450<br>( $< 10^{-10}$ )                    | [8.6993,<br>15.9906]             | 0.3663 | 1103.07 |
| America | Nei's | Great circle               | Minimum | 0.3344<br>(0.0120)             | 4.4513<br>( $< 10^{-11}$ )                     | [3.2228,<br>5.6798]              | 0.7829 | 668.17  |
| America | Nei's | Great circle,<br>waypoints | Minimum | 0.3320<br>(0.0098)             | 4.2897<br>( $< 10^{-11}$ )                     | [3.0962,<br>5.4831]              | 0.7825 | 668.90  |
| America | Nei's | Latitude                   | Minimum | 0.3337<br>(0.0192)             | 4.6507<br>( $< 10^{-11}$ )                     | [3.3640,<br>5.9375]              | 0.7828 | 668.40  |
| America | Nei's | Latitude,<br>waypoints     | Minimum | 0.3408<br>(0.0153)             | 4.7714<br>( $< 10^{-11}$ )                     | [3.4826,<br>6.0603]              | 0.7839 | 666.18  |
| America | Nei's | Longitude                  | Minimum | 0.2425<br>(0.0417)             | 5.4951<br>( $< 10^{-6}$ )                      | [3.3423,<br>7.648]               | 0.7699 | 691.71  |
| America | Nei's | Longitude,                 | Minimum | 0.2442                         | 5.6554                                         | [3.4561,                         | 0.7701 | 691.36  |



|         |       |                            |      |                    |                            |                      |        |        |
|---------|-------|----------------------------|------|--------------------|----------------------------|----------------------|--------|--------|
| America | Nei's | waypoints                  |      | (0.0414)           | ( $< 10^{-6}$ )            | 7.8547]              |        |        |
| America | Nei's | Great circle               | Mean | 0.5922<br>(0.0001) | 7.9696<br>( $< 10^{-38}$ ) | [6.9076,<br>9.0316]  | 0.8431 | 536.38 |
| America | Nei's | Great circle,<br>waypoints | Mean | 0.5922<br>(0.0001) | 7.7453<br>( $< 10^{-38}$ ) | [6.7132,<br>8.7774]  | 0.8431 | 536.38 |
| America | Nei's | Latitude                   | Mean | 0.6114<br>(0.0001) | 8.6692<br>( $< 10^{-42}$ ) | [7.5705,<br>9.7678]  | 0.8487 | 521.61 |
| America | Nei's | Latitude,<br>waypoints     | Mean | 0.6220<br>(0.0001) | 8.8664<br>( $< 10^{-44}$ ) | [7.7735,<br>9.9594]  | 0.8518 | 513.06 |
| America | Nei's | Longitude                  | Mean | 0.3557<br>(0.0021) | 7.9763<br>( $< 10^{-12}$ ) | [5.9237,<br>10.0289] | 0.7889 | 656.79 |
| America | Nei's | Longitude,<br>waypoints    | Mean | 0.3581<br>(0.0015) | 8.2062<br>( $< 10^{-12}$ ) | [6.1109,<br>10.3016] | 0.7893 | 655.99 |

**Table S5: The lowest-*AIC* regression model among 48 models in Eurasia, when excluding the population indicated in column 1.**

| Excluded population | Genetic distance | Geographic distance  | Heterozygosity term | Partial Mantel $r$ ( $p$ -value) | Regression coefficient x $10^{-6}$ ( $p$ -value) | 95% C.I., regression coeff. x $10^{-6}$ | $R^2$  | $AIC$    |
|---------------------|------------------|----------------------|---------------------|----------------------------------|--------------------------------------------------|-----------------------------------------|--------|----------|
| Adygei              | $F_{ST}$         | Longitude, waypoints | Minimum             | 0.7487 (0.0001)                  | 3.7646 ( $< 10^{-126}$ )                         | [3.5172, 4.0120]                        | 0.6499 | -4533.57 |
| Balochi             | $F_{ST}$         | Longitude, waypoints | Minimum             | 0.7583 (0.0001)                  | 3.8239 ( $< 10^{-131}$ )                         | [3.5800, 4.0678]                        | 0.6614 | -4552.13 |
| Basque              | $F_{ST}$         | Longitude, waypoints | Minimum             | 0.7357 (0.0001)                  | 3.7821 ( $< 10^{-119}$ )                         | [3.5238, 4.0405]                        | 0.6418 | -4537.53 |
| Bedouin             | $F_{ST}$         | Longitude, waypoints | Minimum             | 0.7482 (0.0001)                  | 3.7722 ( $< 10^{-126}$ )                         | [3.5240, 4.0204]                        | 0.6531 | -4538.67 |
| Brahui              | $F_{ST}$         | Longitude, waypoints | Minimum             | 0.7599 (0.0001)                  | 3.8262 ( $< 10^{-132}$ )                         | [3.5834, 4.0691]                        | 0.6647 | -4558.36 |
| Burusho             | $F_{ST}$         | Longitude, waypoints | Minimum             | 0.7574 (0.0001)                  | 3.8390 ( $< 10^{-130}$ )                         | [3.5934, 4.0846]                        | 0.6641 | -4545.15 |
| Cambodian           | $F_{ST}$         | Great circle         | Minimum             | 0.7454 (0.0001)                  | 4.4381 ( $< 10^{-124}$ )                         | [4.1435, 4.7327]                        | 0.6641 | -4555.02 |
| Dai                 | $F_{ST}$         | Longitude, waypoints | Minimum             | 0.7463 (0.0001)                  | 3.7042 ( $< 10^{-125}$ )                         | [3.4590, 3.9493]                        | 0.6644 | -4570.53 |
| Daur                | $F_{ST}$         | Longitude,           | Minimum             | 0.7411                           | 3.6704                                           | [3.4237,                                | 0.6618 | -4564.16 |

|                   |          |                            |         |                    |                                                |                                |        |          |
|-------------------|----------|----------------------------|---------|--------------------|------------------------------------------------|--------------------------------|--------|----------|
| Druze             | $F_{ST}$ | waypoints                  | Minimum | 0.7454<br>(0.0001) | $( < 10^{-122})$<br>3.7174<br>$( < 10^{-124})$ | 3.9172]<br>[3.4707,<br>3.9641] | 0.6513 | -4547.66 |
| French            | $F_{ST}$ | Longitude,<br>waypoints    | Minimum | 0.7511<br>(0.0001) | 3.9060<br>$( < 10^{-127})$                     | [3.6511,<br>4.1608]            | 0.6527 | -4547.20 |
| Han               | $F_{ST}$ | Longitude,<br>waypoints    | Minimum | 0.7395<br>(0.0001) | 3.6525<br>$( < 10^{-121})$                     | [3.4057,<br>3.8992]            | 0.6608 | -4569.03 |
| Han<br>(N. China) | $F_{ST}$ | Longitude,<br>waypoints    | Minimum | 0.7388<br>(0.0001) | 3.6446<br>$( < 10^{-121})$                     | [3.3979,<br>3.8914]            | 0.6631 | -4572.17 |
| Hazara            | $F_{ST}$ | Longitude,<br>waypoints    | Minimum | 0.7615<br>(0.0001) | 3.8153<br>$( < 10^{-133})$                     | [3.5743,<br>4.0563]            | 0.6737 | -4571.04 |
| Hezhen            | $F_{ST}$ | Longitude,<br>waypoints    | Minimum | 0.7449<br>(0.0001) | 3.6963<br>$( < 10^{-124})$                     | [3.4506,<br>3.9420]            | 0.6649 | -4574.28 |
| Italian           | $F_{ST}$ | Longitude,<br>waypoints    | Minimum | 0.7416<br>(0.0001) | 3.7802<br>$( < 10^{-122})$                     | [3.5264,<br>4.0339]            | 0.6426 | -4535.06 |
| Japanese          | $F_{ST}$ | Longitude,<br>waypoints    | Minimum | 0.7496<br>(0.0001) | 3.7502<br>$( < 10^{-126})$                     | [3.5044,<br>3.9959]            | 0.6692 | -4587.11 |
| Kalash            | $F_{ST}$ | Great circle,<br>waypoints | Minimum | 0.8348<br>(0.0001) | 4.7263<br>$( < 10^{-182})$                     | [4.4950,<br>4.9576]            | 0.7609 | -4871.79 |
| Lahu              | $F_{ST}$ | Longitude,<br>waypoints    | Minimum | 0.7476<br>(0.0001) | 3.7565<br>$( < 10^{-125})$                     | [3.5089,<br>4.0041]            | 0.6527 | -4563.30 |
| Makrani           | $F_{ST}$ | Longitude,                 | Minimum | 0.7555             | 3.8094                                         | [3.5643,                       | 0.6575 | -4544.05 |

|             |          |                         |         |                    |                                                 |                                |        |          |
|-------------|----------|-------------------------|---------|--------------------|-------------------------------------------------|--------------------------------|--------|----------|
| Miao        | $F_{ST}$ | waypoints               | Minimum | 0.7404<br>(0.0001) | $( < 10^{-129})$<br>3.6621<br>( $< 10^{-122}$ ) | 4.0546]<br>[3.4154,<br>3.9088] | 0.6600 | -4567.22 |
| Mongola     | $F_{ST}$ | Longitude,<br>waypoints | Minimum | 0.7407<br>(0.0001) | 3.6603<br>( $< 10^{-122}$ )                     | [3.4140,<br>3.9067]            | 0.6617 | -4563.96 |
| Naxi        | $F_{ST}$ | Longitude,<br>waypoints | Minimum | 0.7456<br>(0.0001) | 3.7058<br>( $< 10^{-124}$ )                     | [3.4600,<br>3.9516]            | 0.6628 | -4565.83 |
| Orcadian    | $F_{ST}$ | Longitude,<br>waypoints | Minimum | 0.7419<br>(0.0001) | 3.7860<br>( $< 10^{-122}$ )                     | [3.5321,<br>4.0398]            | 0.6456 | -4536.74 |
| Oroqen      | $F_{ST}$ | Longitude,<br>waypoints | Minimum | 0.7428<br>(0.0001) | 3.6704<br>( $< 10^{-124}$ )                     | [3.4249,<br>3.9159]            | 0.6610 | -4567.97 |
| Palestinian | $F_{ST}$ | Longitude               | Minimum | 0.7468<br>(0.0001) | 3.7643<br>( $< 10^{-125}$ )                     | [3.5156,<br>4.0130]            | 0.6497 | -4535.33 |
| Pathan      | $F_{ST}$ | Longitude,<br>waypoints | Minimum | 0.7576<br>(0.0001) | 3.8323<br>( $< 10^{-131}$ )                     | [3.5873,<br>4.0773]            | 0.6599 | -4547.35 |
| Russian     | $F_{ST}$ | Longitude,<br>waypoints | Minimum | 0.7526<br>(0.0001) | 3.7801<br>( $< 10^{-128}$ )                     | [3.5347,<br>4.0256]            | 0.6557 | -4539.62 |
| Sardinian   | $F_{ST}$ | Longitude,<br>waypoints | Minimum | 0.7355<br>(0.0001) | 3.7440<br>( $< 10^{-119}$ )                     | [3.4881,<br>4.0000]            | 0.6401 | -4534.04 |
| She         | $F_{ST}$ | Longitude,<br>waypoints | Minimum | 0.7419<br>(0.0001) | 3.6844<br>( $< 10^{-122}$ )                     | [3.4373,<br>3.9316]            | 0.6598 | -4571.50 |
| Sindhi      | $F_{ST}$ | Longitude,              | Minimum | 0.7574             | 3.8326                                          | [3.5875,                       | 0.6602 | -4546.61 |

|               |          |                      |         |                    |                             |                     |        |          |
|---------------|----------|----------------------|---------|--------------------|-----------------------------|---------------------|--------|----------|
|               |          | waypoints            |         | (0.0001)           | ( $< 10^{-130}$ )           | 4.0778]             |        |          |
| Tu            | $F_{ST}$ | Longitude, waypoints | Minimum | 0.7450<br>(0.0001) | 3.6716<br>( $< 10^{-124}$ ) | [3.4276,<br>3.9155] | 0.6664 | -4574.08 |
| Tujia         | $F_{ST}$ | Longitude, waypoints | Minimum | 0.7416<br>(0.0001) | 3.6527<br>( $< 10^{-122}$ ) | [3.4075,<br>3.8979] | 0.6636 | -4575.47 |
| Tundra Nentsi | $F_{ST}$ | Longitude            | Minimum | 0.7659<br>(0.0001) | 3.8673<br>( $< 10^{-135}$ ) | [3.6264,<br>4.1083] | 0.6819 | -4576.24 |
| Tuscan        | $F_{ST}$ | Longitude, waypoints | Minimum | 0.7468<br>(0.0001) | 3.8374<br>( $< 10^{-125}$ ) | [3.5838,<br>4.0911] | 0.6463 | -4538.26 |
| Uygur         | $F_{ST}$ | Longitude, waypoints | Minimum | 0.7527<br>(0.0001) | 3.7765<br>( $< 10^{-128}$ ) | [3.5314,<br>4.0216] | 0.6630 | -4549.74 |
| Xibo          | $F_{ST}$ | Longitude, waypoints | Minimum | 0.7658<br>(0.0001) | 3.7504<br>( $< 10^{-135}$ ) | [3.5167,<br>3.9841] | 0.6889 | -4619.46 |
| Yakut         | $F_{ST}$ | Longitude, waypoints | Minimum | 0.7464<br>(0.0001) | 3.7251<br>( $< 10^{-126}$ ) | [3.4786,<br>3.9716] | 0.6586 | -4554.85 |
| Yi            | $F_{ST}$ | Longitude, waypoints | Minimum | 0.7427<br>(0.0001) | 3.6797<br>( $< 10^{-123}$ ) | [3.4335,<br>3.9259] | 0.6628 | -4565.45 |

**Table S6: The lowest-*AIC* regression model among 48 models in the Americas, when excluding the population indicated in column 1.**

| Excluded population | Genetic distance | Geographic distance | Heterozygosity term | Partial Mantel $r$ ( $p$ -value) | Regression coefficient x $10^{-6}$ ( $p$ -value) | 95% C.I., regression coeff. x $10^{-6}$ | $R^2$  | $AIC$    |
|---------------------|------------------|---------------------|---------------------|----------------------------------|--------------------------------------------------|-----------------------------------------|--------|----------|
| Ache                | $F_{ST}$         | Latitude, waypoints | Mean                | 0.6039 (0.0001)                  | 4.4446 ( $< 10^{-38}$ )                          | [3.8490, 5.0402]                        | 0.8687 | -2259.57 |
| Arhuaco             | $F_{ST}$         | Latitude, waypoints | Mean                | 0.6734 (0.0001)                  | 5.0311 ( $< 10^{-50}$ )                          | [4.4703, 5.5919]                        | 0.9247 | -2269.82 |
| Aymara              | $F_{ST}$         | Latitude, waypoints | Mean                | 0.6514 (0.0001)                  | 4.9997 ( $< 10^{-46}$ )                          | [4.4084, 5.5910]                        | 0.9164 | -2233.64 |
| Cabecar             | $F_{ST}$         | Latitude, waypoints | Mean                | 0.6293 (0.0001)                  | 4.8052 ( $< 10^{-42}$ )                          | [4.2026, 5.4077]                        | 0.9144 | -2215.93 |
| Chipewyan           | $F_{ST}$         | Latitude, waypoints | Mean                | 0.5808 (0.0001)                  | 4.5650 ( $< 10^{-34}$ )                          | [3.9153, 5.2146]                        | 0.9197 | -2241.72 |
| Cree                | $F_{ST}$         | Latitude, waypoints | Mean                | 0.6235 (0.0001)                  | 4.7305 ( $< 10^{-41}$ )                          | [4.1281, 5.3328]                        | 0.9216 | -2252.77 |
| Embera              | $F_{ST}$         | Latitude, waypoints | Mean                | 0.6351 (0.0001)                  | 4.8921 ( $< 10^{-43}$ )                          | [4.2880, 5.4961]                        | 0.9133 | -2213.90 |
| Guarani             | $F_{ST}$         | Latitude, waypoints | Mean                | 0.6418 (0.0001)                  | 5.0057 ( $< 10^{-44}$ )                          | [4.3984, 5.6130]                        | 0.9133 | -2215.03 |
| Guaymi              | $F_{ST}$         | Latitude,           | Mean                | 0.6312                           | 4.7908                                           | [4.1930,                                | 0.9126 | -2219.37 |

|           |          |                     |      |                    |                                   |                     |        |          |
|-----------|----------|---------------------|------|--------------------|-----------------------------------|---------------------|--------|----------|
|           |          | waypoints           |      | (0.0001)           | ( < 10 <sup>-42</sup> )           | 5.3886]             |        |          |
| Huilliche | $F_{ST}$ | Latitude, waypoints | Mean | 0.6703<br>(0.0001) | 5.5341<br>( < 10 <sup>-49</sup> ) | [4.9119,<br>6.1562] | 0.9178 | -2235.51 |
| Inga      | $F_{ST}$ | Latitude, waypoints | Mean | 0.6223<br>(0.0002) | 4.7234<br>( < 10 <sup>-41</sup> ) | [4.1201,<br>5.3267] | 0.9130 | -2211.66 |
| Kaingang  | $F_{ST}$ | Latitude, waypoints | Mean | 0.6403<br>(0.0001) | 4.9858<br>( < 10 <sup>-44</sup> ) | [4.3784,<br>5.5932] | 0.9141 | -2218.26 |
| Kaqchikel | $F_{ST}$ | Latitude, waypoints | Mean | 0.6335<br>(0.0001) | 4.8099<br>( < 10 <sup>-42</sup> ) | [4.2133,<br>5.4064] | 0.9132 | -2225.13 |
| Karitiana | $F_{ST}$ | Latitude, waypoints | Mean | 0.6275<br>(0.0001) | 4.7913<br>( < 10 <sup>-41</sup> ) | [4.1876,<br>5.3950] | 0.9091 | -2208.92 |
| Kogi      | $F_{ST}$ | Latitude, waypoints | Mean | 0.6268<br>(0.0001) | 4.7152<br>( < 10 <sup>-41</sup> ) | [4.1199,<br>5.3104] | 0.9130 | -2222.18 |
| Maya      | $F_{ST}$ | Latitude, waypoints | Mean | 0.6434<br>(0.0001) | 4.9813<br>( < 10 <sup>-44</sup> ) | [4.3795,<br>5.5832] | 0.9115 | -2217.06 |
| Mixe      | $F_{ST}$ | Latitude, waypoints | Mean | 0.6392<br>(0.0001) | 4.9141<br>( < 10 <sup>-43</sup> ) | [4.3137,<br>5.5146] | 0.9144 | -2218.09 |
| Mixtec    | $F_{ST}$ | Latitude, waypoints | Mean | 0.6371<br>(0.0001) | 4.9164<br>( < 10 <sup>-43</sup> ) | [4.3124,<br>5.5204] | 0.9132 | -2213.95 |
| Ojibwa    | $F_{ST}$ | Latitude, waypoints | Mean | 0.6295<br>(0.0001) | 4.7584<br>( < 10 <sup>-42</sup> ) | [4.1621,<br>5.3548] | 0.9206 | -2248.87 |
| Piapoco   | $F_{ST}$ | Latitude,           | Mean | 0.6269             | 4.7564                            | [4.1562,            | 0.9140 | -2215.71 |

|                      |          |                                     |      |                                |                                                |                                |        |          |
|----------------------|----------|-------------------------------------|------|--------------------------------|------------------------------------------------|--------------------------------|--------|----------|
| Pima                 | $F_{ST}$ | waypoints<br>Latitude,<br>waypoints | Mean | (0.0001)<br>0.6473<br>(0.0001) | ( $< 10^{-41}$ )<br>5.0052<br>( $< 10^{-45}$ ) | 5.3565]<br>[4.4067,<br>5.6036] | 0.9145 | -2220.88 |
| Quechua              | $F_{ST}$ | Latitude,<br>waypoints              | Mean | 0.6279<br>(0.0001)             | 4.8076<br>( $< 10^{-41}$ )                     | [4.2024,<br>5.4127]            | 0.9101 | -2209.41 |
| Surui                | $F_{ST}$ | Latitude,<br>waypoints              | Mean | 0.6321<br>(0.0001)             | 4.8379<br>( $< 10^{-42}$ )                     | [4.2358,<br>5.4401]            | 0.8944 | -2213.59 |
| Ticuna<br>(Arara)    | $F_{ST}$ | Latitude,<br>waypoints              | Mean | 0.6303<br>(0.0001)             | 4.7217<br>( $< 10^{-42}$ )                     | [4.1313,<br>5.3122]            | 0.9143 | -2223.90 |
| Ticuna<br>(Tarapaca) | $F_{ST}$ | Latitude,<br>waypoints              | Mean | 0.6295<br>(0.0001)             | 4.6522<br>( $< 10^{-42}$ )                     | [4.0691,<br>5.2353]            | 0.9178 | -2233.59 |
| Waunana              | $F_{ST}$ | Latitude,<br>waypoints              | Mean | 0.6244<br>(0.0001)             | 4.8098<br>( $< 10^{-41}$ )                     | [4.1988,<br>5.4209]            | 0.9115 | -2204.18 |
| Wayuu                | $F_{ST}$ | Latitude,<br>waypoints              | Mean | 0.6330<br>(0.0001)             | 4.9311<br>( $< 10^{-42}$ )                     | [4.3188,<br>5.5434]            | 0.9104 | -2206.80 |
| Zapotec              | $F_{ST}$ | Latitude,<br>waypoints              | Mean | 0.6373<br>(0.0001)             | 4.9458<br>( $< 10^{-43}$ )                     | [4.3386,<br>5.5531]            | 0.9111 | -2211.82 |
| Zenu                 | $F_{ST}$ | Latitude,<br>waypoints              | Mean | 0.6260<br>(0.0001)             | 4.8123<br>( $< 10^{-41}$ )                     | [4.2036,<br>5.4210]            | 0.9127 | -2209.90 |



**Table S7: Estimates of regression coefficients for geographic distance and regression error  $\sigma^2$  from GESTE, based on genotypes at 678 microsatellite loci in the Eurasian and American samples.**

The table reports the mean of parameter estimates for the most-visited model in each continent (the proportion of iterations, among 9999, where the displayed model was visited is shown). 95% high posterior density intervals (HPDIs) are shown in parentheses with the mean estimates for  $\sigma^2$  and regression coefficients across iterations that visited the most-visited model.

| Continent | Number of individuals | Most-visited model         | $\sigma^2$                    | Constant                         | Longitude                        |
|-----------|-----------------------|----------------------------|-------------------------------|----------------------------------|----------------------------------|
| Eurasia   | 740                   | Longitude only<br>(94.04%) | 0.3024<br>[0.1825,<br>0.4591] | -3.7640<br>[-3.9387,<br>-3.5908] | -0.2527<br>[-0.4243,<br>-0.0796] |
| America   | 404                   | Longitude only<br>(51.82%) | 0.8997<br>[0.419,<br>1.4023]  | -2.8491<br>[-3.1972,<br>-2.4883] | -0.3740<br>[-0.6866,<br>-0.0651] |

**Table S8: Estimates of regression coefficients for geographic distance and regression error  $\sigma^2$  from GESTE, jackknifing over populations in Eurasia.**

The codes for models are as follows: (i) constant, (ii) constant and latitude, (iii) constant and longitude, (iv) constant, latitude and longitude. The proportion of times the two most-visited models were chosen, out of 9999 iterations, is shown. Mean estimates and 95% HPDIs for  $\sigma^2$  and for regression coefficients are given for the most-visited model (note that the best model is the model with a constant and longitude for all jackknife runs except one, where the model chosen is a constant only).

| Excluded population | Most-visited model  | Second most-visited model | $\sigma^2$                 | Constant                      | Longitude                     |
|---------------------|---------------------|---------------------------|----------------------------|-------------------------------|-------------------------------|
| Adygei              | <i>iii</i> (73.73%) | <i>i</i> (23.57%)         | 0.3022<br>[0.1775, 0.4534] | -3.7497<br>[-3.9150, -3.5687] | -0.2216<br>[-0.3762, -0.0547] |
| Balochi             | <i>iii</i> (77.02%) | <i>i</i> (19.87%)         | 0.2943<br>[0.1701, 0.4295] | -3.7501<br>[-3.9267, -3.5763] | -0.2254<br>[-0.3770, -0.0597] |
| Basque              | <i>iii</i> (90.99%) | <i>i</i> (5.81%)          | 0.2972<br>[0.1757, 0.4442] | -3.7705<br>[-3.9384, -3.5852] | -0.2452<br>[-0.4187, -0.0835] |
| Bedouin             | <i>iii</i> (60.91%) | <i>i</i> (35.91%)         | 0.3058<br>[0.1814, 0.4541] | -3.7674<br>[-3.9387, -3.5837] | -0.2166<br>[-0.3703, -0.0544] |
| Brahui              | <i>iii</i> (82.89%) | <i>i</i> (14.02%)         | 0.2970<br>[0.1777, 0.4447] | -3.7561<br>[-3.9331, -3.5801] | -0.2281<br>[-0.3992, -0.0724] |
| Burusho             | <i>iii</i> (84.13%) | <i>i</i> (12.80%)         | 0.2992<br>[0.1694, 0.4392] | -3.7503<br>[-3.9226, -3.5658] | -0.2455<br>[-0.4059, -0.0840] |
| Cambodian           | <i>iii</i> (95.75%) | <i>iv</i> (3.12%)         | 0.3185<br>[0.1781, 0.4755] | -3.7663<br>[-3.9439, -3.5824] | -0.2745<br>[-0.4486, -0.0967] |

|                   |                     |                   |                            |                               |                               |
|-------------------|---------------------|-------------------|----------------------------|-------------------------------|-------------------------------|
| Dai               | <i>iii</i> (95.67%) | <i>iv</i> (3.03%) | 0.3122<br>[0.1811, 0.4620] | -3.7737<br>[-3.9519, -3.5968] | -0.2738<br>[-0.4515, -0.0951] |
| Daur              | <i>iii</i> (95.80%) | <i>iv</i> (3.07%) | 0.3150<br>[0.1819, 0.4742] | -3.7651<br>[-3.9496, -3.5812] | -0.2780<br>[-0.4637, -0.1062] |
| Druze             | <i>iii</i> (82.88%) | <i>i</i> (14.09%) | 0.3027<br>[0.1716, 0.4481] | -3.7698<br>[-3.9422, -3.5895] | -0.2260<br>[-0.3859, -0.0601] |
| French            | <i>iii</i> (58.68%) | <i>i</i> (38.65%) | 0.3007<br>[0.1766, 0.4411] | -3.7535<br>[-3.9300, -3.5753] | -0.2071<br>[-0.3584, -0.0460] |
| Han               | <i>iii</i> (96.61%) | <i>iv</i> (3.01%) | 0.3220<br>[0.1883, 0.4826] | -3.7684<br>[-3.9496, -3.5873] | -0.2994<br>[-0.4770, -0.1095] |
| Han<br>(N. China) | <i>iii</i> (95.90%) | <i>iv</i> (2.66%) | 0.3144<br>[0.1862, 0.4771] | -3.7623<br>[-3.9374, -3.5826] | -0.2835<br>[-0.4552, -0.1032] |
| Hazara            | <i>iii</i> (95.82%) | <i>iv</i> (2.60%) | 0.2798<br>[0.1628, 0.4169] | -3.7294<br>[-3.8943, -3.5572] | -0.2635<br>[-0.4330, -0.0987] |
| Hezhen            | <i>iii</i> (94.36%) | <i>iv</i> (2.85%) | 0.3131<br>[0.1853, 0.4696] | -3.7737<br>[-3.9628, -3.5978] | -0.2647<br>[-0.4406, -0.0927] |
| Italian           | <i>iii</i> (72.83%) | <i>i</i> (24.22%) | 0.3056<br>[0.1810, 0.4534] | -3.7553<br>[-3.9308, -3.5801] | -0.2255<br>[-0.3828, -0.0659] |
| Japanese          | <i>iii</i> (96.28%) | <i>iv</i> (3.05%) | 0.3202<br>[0.1869, 0.4798] | -3.7737<br>[-3.9549, -3.5918] | -0.2876<br>[-0.4649, -0.1034] |
| Kalash            | <i>iii</i> (93.89%) | <i>i</i> (3.06%)  | 0.2717<br>[0.1574, 0.4103] | -3.7901<br>[-3.9642, -3.6250] | -0.2462<br>[-0.4078, -0.0888] |
| Lahu              | <i>iii</i> (94.49%) | <i>iv</i> (3.03%) | 0.2897<br>[0.1710, 0.4394] | -3.7899<br>[-3.9688, -3.6231] | -0.2553<br>[-0.4330, -0.0918] |

|             |                     |                     |                               |                               |                               |
|-------------|---------------------|---------------------|-------------------------------|-------------------------------|-------------------------------|
| Makrani     | <i>iii</i> (80.83%) | <i>i</i> (16.13%)   | 0.2904<br>[0.1690,<br>0.4301] | -3.7466<br>[-3.9100, -3.5659] | -0.2228<br>[-0.3860, -0.0707] |
| Miao        | <i>iii</i> (95.09%) | <i>iv</i> (3.02%)   | 0.3152<br>[0.1814,<br>0.4709] | -3.7770<br>[-3.9522, -3.5928] | -0.2749<br>[-0.4530, -0.1021] |
| Mongola     | <i>iii</i> (96.45%) | <i>iv</i> (2.63%)   | 0.3127<br>[0.1766,<br>0.4671] | -3.7587<br>[-3.9396, -3.5805] | -0.2836<br>[-0.4578, -0.0988] |
| Naxi        | <i>iii</i> (94.32%) | <i>iv</i> (3.08%)   | 0.3106<br>[0.1820,<br>0.4636] | -3.7762<br>[-3.9570, -3.5974] | -0.2709<br>[-0.4526, -0.1041] |
| Orcadian    | <i>iii</i> (83.77%) | <i>i</i> (13.61%)   | 0.2984<br>[0.1735,<br>0.4425] | -3.7653<br>[-3.9421, -3.5859] | -0.2458<br>[-0.4053, -0.0832] |
| Oroqen      | <i>iii</i> (88.51%) | <i>i</i> (8.18%)    | 0.3126<br>[0.1803,<br>0.4655] | -3.7767<br>[-3.9546, -3.5959] | -0.2645<br>[-0.4287, -0.0876] |
| Palestinian | <i>i</i> (53.95%)   | <i>iii</i> (43.18%) | 0.3498<br>[0.2056,<br>0.5287] | -3.7622<br>[-3.9578, -3.5755] |                               |
| Pathan      | <i>iii</i> (86.82%) | <i>i</i> (10.08%)   | 0.2845<br>[0.1682,<br>0.4277] | -3.7413<br>[-3.9176, -3.5781] | -0.2289<br>[-0.3892, -0.0650] |
| Russian     | <i>iii</i> (64.50%) | <i>i</i> (32.32%)   | 0.3021<br>[0.1835,<br>0.4530] | -3.7523<br>[-3.9208, -3.5713] | -0.2199<br>[-0.3797, -0.0566] |
| Sardinian   | <i>iii</i> (85.44%) | <i>i</i> (11.18%)   | 0.3031<br>[0.1738,<br>0.4508] | -3.7676<br>[-3.9479, -3.5890] | -0.2344<br>[-0.3975, -0.0658] |
| She         | <i>iii</i> (94.06%) | <i>iv</i> (3.09%)   | 0.3072<br>[0.1789,<br>0.4617] | -3.7847<br>[-3.9711, -3.6114] | -0.2608<br>[-0.4329, -0.0851] |

|               |                     |                   |                            |                               |                               |
|---------------|---------------------|-------------------|----------------------------|-------------------------------|-------------------------------|
| Sindhi        | <i>iii</i> (77.23%) | <i>i</i> (19.88%) | 0.2841<br>[0.1646, 0.4231] | -3.7430<br>[-3.9176, -3.5803] | -0.2301<br>[-0.3896, -0.0790] |
| Tu            | <i>iii</i> (96.02%) | <i>iv</i> (2.88%) | 0.3157<br>[0.1775, 0.4739] | -3.7639<br>[-3.9462, -3.5846] | -0.2784<br>[-0.4575, -0.1028] |
| Tujia         | <i>iii</i> (95.68%) | <i>iv</i> (2.79%) | 0.3175<br>[0.1831, 0.4756] | -3.7692<br>[-3.9509, -3.5859] | -0.2777<br>[-0.4594, -0.1029] |
| Tundra Nentsi | <i>iii</i> (95.29%) | <i>iv</i> (2.49%) | 0.3116<br>[0.1790, 0.4671] | -3.7653<br>[-3.9493, -3.5869] | -0.2645<br>[-0.4390, -0.0946] |
| Tuscan        | <i>iii</i> (55.98%) | <i>i</i> (41.15%) | 0.3013<br>[0.1824, 0.4479] | -3.7468<br>[-3.9323, -3.5756] | -0.2166<br>[-0.3750, -0.0656] |
| Uygur         | <i>iii</i> (96.71%) | <i>iv</i> (2.86%) | 0.2599<br>[0.1468, 0.3866] | -3.7272<br>[-3.8863, -3.5614] | -0.2690<br>[-0.4425, -0.1087] |
| Xibo          | <i>iii</i> (95.68%) | <i>iv</i> (2.88%) | 0.3154<br>[0.1803, 0.4758] | -3.7636<br>[-3.9409, -3.5852] | -0.2771<br>[-0.4502, -0.0970] |
| Yakut         | <i>iii</i> (94.80%) | <i>iv</i> (2.93%) | 0.3104<br>[0.1731, 0.4603] | -3.7780<br>[-3.9602, -3.6029] | -0.2627<br>[-0.4382, -0.0854] |
| Yi            | <i>iii</i> (95.80%) | <i>iv</i> (2.88%) | 0.3156<br>[0.1833, 0.4706] | -3.7700<br>[-3.9506, -3.5900] | -0.2784<br>[-0.4631, -0.1057] |

**Table S9: Estimates of regression coefficients for geographic distance and regression error  $\sigma^2$  from GESTE, jackknifing over populations in America.**

The codes for models are as follows: (i) constant, (ii) constant and latitude, (iii) constant and longitude, (iv) constant, latitude and longitude. The proportion of times the two most-visited models were chosen, out of 9999 iterations, is shown. Mean estimates and 95% HPDIs for  $\sigma^2$  and for regression coefficients are given for the most-visited model (note that the best model is either the model with only a constant, or the model with a constant and longitude).

| Excluded population | Most-visited model  | Second most-visited model | $\sigma^2$                 | Constant                      | Longitude                     |
|---------------------|---------------------|---------------------------|----------------------------|-------------------------------|-------------------------------|
| Ache                | <i>i</i> (72.18%)   | <i>iii</i> (20.00%)       | 0.8897<br>[0.4627, 1.3836] | -2.9202<br>[-3.2676, -2.5759] |                               |
| Arhuaco             | <i>iii</i> (48.55%) | <i>i</i> (40.46%)         | 0.9220<br>[0.4847, 1.4210] | -2.8680<br>[-3.2320, -2.5118] | -0.3692<br>[-0.6820, -0.0475] |
| Aymara              | <i>iii</i> (57.62%) | <i>i</i> (31.77%)         | 0.8541<br>[0.4541, 1.3323] | -2.8064<br>[-3.1401, -2.4535] | -0.3991<br>[-0.7132, -0.0812] |
| Cabecar             | <i>iii</i> (52.47%) | <i>i</i> (35.47%)         | 0.9350<br>[0.5123, 1.4565] | -2.8607<br>[-3.2141, -2.4936] | -0.3817<br>[-0.7360, -0.0746] |
| Chipewyan           | <i>iii</i> (62.49%) | <i>i</i> (26.54%)         | 0.9276<br>[0.4836, 1.4295] | -2.8579<br>[-3.2196, -2.5209] | -0.4065<br>[-0.7420, -0.0865] |
| Cree                | <i>iii</i> (48.42%) | <i>i</i> (40.58%)         | 0.9425<br>[0.4855, 1.4621] | -2.8390<br>[-3.1728, -2.4624] | -0.3546<br>[-0.6688, -0.0210] |
| Embera              | <i>iii</i> (46.74%) | <i>i</i> (42.31%)         | 0.9339<br>[0.5215, 1.4578] | -2.8544<br>[-3.2115, -2.5046] | -0.3748<br>[-0.7131, -0.0478] |

|           |                     |                     |                            |                               |                               |
|-----------|---------------------|---------------------|----------------------------|-------------------------------|-------------------------------|
| Guarani   | <i>iii</i> (71.15%) | <i>i</i> (15.10%)   | 0.8994<br>[0.4795, 1.4117] | -2.8336<br>[-3.2017, -2.4876] | -0.4219<br>[-0.7453, -0.0813] |
| Guaymi    | <i>iii</i> (60.38%) | <i>i</i> (27.28%)   | 0.8927<br>[0.4848, 1.4003] | -2.8810<br>[-3.2283, -2.5283] | -0.3875<br>[-0.6921, -0.0670] |
| Huilliche | <i>iii</i> (46.56%) | <i>i</i> (40.46%)   | 0.8992<br>[0.4664, 1.3975] | -2.8244<br>[-3.1560, -2.4571] | -0.3864<br>[-0.7001, -0.0566] |
| Inga      | <i>iii</i> (49.93%) | <i>i</i> (39.23%)   | 0.9205<br>[0.4844, 1.4329] | -2.8330<br>[-3.1932, -2.4892] | -0.3807<br>[-0.7023, -0.0591] |
| Kaingang  | <i>iii</i> (48.03%) | <i>i</i> (40.61%)   | 0.9253<br>[0.5193, 1.4548] | -2.8763<br>[-3.2364, -2.5292] | -0.3600<br>[-0.7045, -0.0545] |
| Kaqchikel | <i>i</i> (56.61%)   | <i>iii</i> (34.11%) | 0.9597<br>[0.4996, 1.4605] | -2.7836<br>[-3.1581, -2.4301] |                               |
| Karitiana | <i>i</i> (54.39%)   | <i>iii</i> (35.66%) | 1.0148<br>[0.5246, 1.5585] | -2.8798<br>[-3.2567, -2.4969] |                               |
| Kogi      | <i>i</i> (45.84%)   | <i>iii</i> (43.41%) | 1.0399<br>[0.5453, 1.6175] | -2.8801<br>[-3.2625, -2.5147] |                               |
| Maya      | <i>i</i> (53.77%)   | <i>iii</i> (36.28%) | 0.9463<br>[0.5105, 1.4929] | -2.7814<br>[-3.1297, -2.4165] |                               |
| Mixe      | <i>iii</i> (52.32%) | <i>i</i> (36.05%)   | 0.9165<br>[0.4842, 1.4215] | -2.8316<br>[-3.1810, -2.4522] | -0.3784<br>[-0.6830, -0.0367] |
| Mixtec    | <i>iii</i> (49.58%) | <i>i</i> (38.40%)   | 0.9302<br>[0.4989, 1.4570] | -2.8320<br>[-3.1726, -2.4674] | -0.3699<br>[-0.6929, -0.0543] |

|                   |                     |                     |                            |                               |                               |
|-------------------|---------------------|---------------------|----------------------------|-------------------------------|-------------------------------|
| Ojibwa            | <i>iii</i> (46.15%) | <i>i</i> (27.95%)   | 0.9424<br>[0.5056, 1.4796] | -2.8407<br>[-3.2073, -2.4822] | -0.3703<br>[-0.6887, -0.0440] |
| Piapoco           | <i>iii</i> (51.32%) | <i>i</i> (36.82%)   | 0.9318<br>[0.5066, 1.4709] | -2.8494<br>[-3.2008, -2.4989] | -0.3781<br>[-0.6973, -0.0560] |
| Pima              | <i>iii</i> (71.61%) | <i>iv</i> (19.17%)  | 0.8531<br>[0.4521, 1.3495] | -2.8694<br>[-3.2212, -2.5349] | -0.4547<br>[-0.7741, -0.1344] |
| Quechua           | <i>iii</i> (59.12%) | <i>i</i> (30.02%)   | 0.7963<br>[0.4265, 1.2275] | -2.7793<br>[-3.1179, -2.4673] | -0.3975<br>[-0.6993, -0.1017] |
| Surui             | <i>i</i> (62.73%)   | <i>iii</i> (27.42%) | 0.9529<br>[0.5130, 1.4606] | -2.9072<br>[-3.2861, -2.5575] |                               |
| Ticuna (Arara)    | <i>iii</i> (47.08%) | <i>i</i> (42.03%)   | 0.9132<br>[0.4734, 1.4139] | -2.8863<br>[-3.2543, -2.5214] | -0.3587<br>[-0.6550, -0.0131] |
| Ticuna (Tarapaca) | <i>iii</i> (48.48%) | <i>i</i> (40.56%)   | 0.9179<br>[0.4941, 1.4567] | -2.8737<br>[-3.2418, -2.5300] | -0.3651<br>[-0.6924, -0.0395] |
| Waunana           | <i>iii</i> (50.01%) | <i>i</i> (38.30%)   | 0.9327<br>[0.4835, 1.4380] | -2.8523<br>[-3.2215, -2.5082] | -0.3768<br>[-0.6933, -0.0254] |
| Wayuu             | <i>iii</i> (60.11%) | <i>i</i> (24.12%)   | 0.8979<br>[0.4691, 1.4070] | -2.8110<br>[-3.1550, -2.4545] | -0.3917<br>[-0.6939, -0.0581] |
| Zapotec           | <i>i</i> (59.23%)   | <i>iii</i> (31.46%) | 1.0208<br>[0.5692, 1.5855] | -2.8094<br>[-3.1607, -2.4282] |                               |
| Zenu              | <i>iii</i> (55.03%) | <i>i</i> (32.01%)   | 0.9323<br>[0.4840, 1.4353] | -2.8398<br>[-3.2059, -2.4831] | -0.3785<br>[-0.7009, -0.0604] |
